# Supplementary material
Source: HighWire-hosted journal article supplement (https://gh.bmj.com/content/9/2/e013521)
Supplement: inline-supplementary-material-1 [file inline-supplementary-material-1.pdf]

1 **Additional file**

2 *Add. File 1. Distribution of Latin American workers participants' characteristics according to their*  
 3 *participation in the phases of the concept mapping*

| Participants' characteristics                                             | Overall (N=27) |      | Brainstorming (N=17) |       | Sorting-rating* (N=23) |       | Attended both (N=13) |      |   |      |
|---------------------------------------------------------------------------|----------------|------|----------------------|-------|------------------------|-------|----------------------|------|---|------|
|                                                                           | n              | %    | N                    | %     | n                      | %     | n                    | %    |   |      |
| <b>Female</b>                                                             | 11             | 40.7 |                      |       | 9                      | 52.9  | 9                    | 39.1 | 7 | 53.9 |
| <b>Country of birth</b>                                                   |                |      |                      |       |                        |       |                      |      |   |      |
| Colombia                                                                  | 15             | 55.6 | 9                    | 52.9  | 12                     | 52.2  | 6                    | 46.2 |   |      |
| Ecuador                                                                   | 7              | 25.9 | 5                    | 29.4  | 6                      | 26.1  | 4                    | 30.8 |   |      |
| Other <sup>1</sup>                                                        | 5              | 18.5 | 3                    | 17.7  | 5                      | 21.7  | 3                    | 23.1 |   |      |
| <b>Level of English</b>                                                   |                |      |                      |       |                        |       |                      |      |   |      |
| fluent or almost                                                          | 6              | 22.2 | 3                    | 17.7  | 5                      | 21.7  | 2                    | 15.4 |   |      |
| can speak but cannot read/write                                           | 2              | 7.4  | 1                    | 5.9   | 2                      | 8.7   | 1                    | 7.7  |   |      |
| can read/write but cannot speak                                           | 6              | 22.2 | 4                    | 23.5  | 5                      | 21.7  | 3                    | 23.1 |   |      |
| speak, read/write with difficulty                                         | 11             | 40.7 | 7                    | 41.2  | 11                     | 47.8  | 7                    | 53.9 |   |      |
| cannot speak, read/write                                                  | 1              | 3.7  | 1                    | 5.9   | 0                      | 0.0   | 0                    | 0.0  |   |      |
| missing                                                                   | 1              | 3.7  | 1                    | 5.9   | 0                      | 0.0   | 0                    | 0.0  |   |      |
| <b>Way s/he found the current job:</b>                                    |                |      |                      |       |                        |       |                      |      |   |      |
| someone s/he knows told him/her about the job                             | 21             | 77.8 | 12                   | 70.6  | 20                     | 87    | 1                    | 84.6 |   |      |
| found it him/herself                                                      | 3              | 11.1 | 2                    | 11.8  | 2                      | 8.7   | 1                    | 7.7  |   |      |
| Other (unemployed)                                                        | 1              | 3.7  | 1                    | 5.9   | 0                      | 0.0   | 0                    | 0.0  |   |      |
| Missing                                                                   | 2              | 7.4  | 2                    | 11.8  | 1                      | 4.4   | 1                    | 7.7  |   |      |
| <b>Type of employer</b>                                                   |                |      |                      |       |                        |       |                      |      |   |      |
| Employed by the workplace where s/he works (in-house / internal employee) | 6              | 22.2 | 2                    | 11.8  | 5                      | 21.7  | 1                    | 7.7  |   |      |
| employed by an outsourcing company                                        | 17             | 63   | 11                   | 64.7  | 15                     | 65.22 | 9                    | 69.2 |   |      |
| unemployed                                                                | 1              | 3.7  | 1                    | 5.9   | 0                      | 0.0   | 0                    | 0.0  |   |      |
| Other <sup>2</sup>                                                        | 2              | 7.4  | 2                    | 11.86 | 2                      | 8.7   | 2                    | 15.4 |   |      |
| missing                                                                   | 1              | 3.7  | 1                    | 5.9   | 1                      | 4.4   | 1                    | 7.7  |   |      |
| <b>Current job title</b>                                                  |                |      |                      |       |                        |       |                      |      |   |      |
| cleaner                                                                   | 22             | 81.5 | 15                   | 88.2  | 18                     | 78.3  | 1                    | 84.6 |   |      |
| ex-cleaner                                                                | 1              | 3.7  | 1                    | 5.9   | 1                      | 4.4   | 1                    | 7.7  |   |      |
| gardener                                                                  | 1              | 3.7  | 0                    | 0.0   | 1                      | 4.4   | 0                    | 0.0  |   |      |
| bartender                                                                 | 1              | 3.7  | 0                    | 0.0   | 1                      | 4.4   | 0                    | 0.0  |   |      |
| cook                                                                      | 1              | 3.7  | 0                    | 0.0   | 1                      | 4.4   | 0                    | 0.0  |   |      |
| interpreter                                                               | 1              | 3.7  | 1                    | 5.9   | 1                      | 4.4   | 1                    | 7.7  |   |      |
| <b>Highest level of education completed</b>                               |                |      |                      |       |                        |       |                      |      |   |      |
| primary school                                                            | 1              | 3.7  | 1                    | 5.98  | 1                      | 4.4   | 1                    | 7.7  |   |      |
| secondary school / A-levels                                               | 13             | 48.2 | 9                    | 52.9  | 11                     | 47.8  | 7                    | 53.9 |   |      |
| higher education                                                          | 7              | 25.9 | 3                    | 17.7  | 7                      | 30.4  | 3                    | 23.1 |   |      |
| vocational training                                                       | 2              | 7.4  | 0                    | 0.0   | 2                      | 8.7   | 0                    | 0.0  |   |      |
| English certificate                                                       | 1              | 3.7  | 1                    | 5.9   | 1                      | 4.4   | 1                    | 7.7  |   |      |
| missing                                                                   | 3              | 11.1 | 3                    | 17.7  | 1                      | 8.7   | 1                    | 7.7  |   |      |
| <b>Working full-time</b>                                                  |                |      |                      |       |                        |       |                      |      |   |      |
| full-time                                                                 | 13             | 48.2 | 8                    | 47.1  | 11                     | 47.8  | 6                    | 46.2 |   |      |
| part-time                                                                 | 13             | 48.2 | 8                    | 47.1  | 12                     | 52.2  | 7                    | 53.9 |   |      |
| unemployed                                                                | 1              | 3.7  | 1                    | 5.9   | 0                      | 0.0   | 0                    | 0.0  |   |      |

- 4 Notes: \* includes 1 participant who only performed the rating; <sup>1</sup> Spanish-speaking country of central and South  
5 America; <sup>2</sup> includes: 'both in-house and outsourced'; and 'retired'
